# Supplementary material for: Functional Outcomes of Brolucizumab-Induced Intraocular Inflammation Involving the Posterior Segment—A Meta-Analysis and Systematic Review
Source: MDPI journal article supplement (doi:10.3390/jcm12144671), 2023-07-14
Supplement: s1 [file s1]

## **Supplementary Materials**

### Search Strings

#### PubMed

((Brolucizumab[Title/Abstract] OR Beovu[Title/Abstract]) AND (AMD[Title/Abstract] OR macular degeneration[Title/Abstract] OR macula\*[Title/Abstract]) AND ((inflammation[Title/Abstract] OR vasculitis[Title/Abstract] OR occlusion[Title/Abstract] OR uveitis[Title/Abstract]))

#### Scopus

TITLE-ABS-KEY((Brolucizumab OR Beovu) AND (AMD OR macular degeneration OR macula\*) AND (inflammation OR vasculitis OR occlusion OR uveitis))

#### ClinicalTrials.gov

Condition or disease: wet age-related macular degeneration; Intervention/treatment: Brolucizumab

#### CENTRAL

Brolucizumab OR Beovu in Title Abstract Keyword AND AMD OR macular degeneration OR macula\* OR inflammation OR vasculitis OR occlusion OR uveitis in Title Abstract Keyword

**Supplemental Table S1:** JBI Critical Appraisal Tool Rating

| Paper           | 1. Were there clear criteria for inclusion in the case series? | 2. Was the condition measured in a standard, reliable way for all participants included in the case series? | 3. Were valid methods used for identification of the condition for all participants included in the case series? | 4. Did the case series have consecutive inclusion of participants? | 5. Did the case series have complete inclusion of participants? | 6. Was there clear reporting of the demographics of the participants in the study? | 7. Was there clear reporting of clinical information of the participants? | 8. Were the outcomes or follow-up results of cases clearly reported? | 9. Was there clear reporting of the presenting sites'/clinics' demographic information? | 10. Was statistical analysis appropriate? |
|-----------------|----------------------------------------------------------------|-------------------------------------------------------------------------------------------------------------|------------------------------------------------------------------------------------------------------------------|--------------------------------------------------------------------|-----------------------------------------------------------------|------------------------------------------------------------------------------------|---------------------------------------------------------------------------|----------------------------------------------------------------------|-----------------------------------------------------------------------------------------|-------------------------------------------|
| Jain 2020       | 1                                                              | n.a.                                                                                                        | 1                                                                                                                | n.a.                                                               | 0                                                               | 1                                                                                  | 1                                                                         | 1                                                                    | 0                                                                                       | n.a.                                      |
| Saito 2022      | 1                                                              | n.a.                                                                                                        | 1                                                                                                                | n.a.                                                               | 0                                                               | 1                                                                                  | 0                                                                         | 1                                                                    | 0                                                                                       | n.a.                                      |
| Haug 2020       | 1                                                              | n.a.                                                                                                        | 1                                                                                                                | n.a.                                                               | 0                                                               | 1                                                                                  | 1                                                                         | 1                                                                    | 0                                                                                       | n.a.                                      |
| Iyer 2020       | 1                                                              | n.a.                                                                                                        | 1                                                                                                                | n.a.                                                               | 0                                                               | 1                                                                                  | 0                                                                         | 1                                                                    | 1                                                                                       | n.a.                                      |
| Kusuhara 2022   | 1                                                              | n.a.                                                                                                        | 1                                                                                                                | n.a.                                                               | 0                                                               | 1                                                                                  | 1                                                                         | 1                                                                    | 1                                                                                       | n.a.                                      |
| Singer 2021     | 1                                                              | 1                                                                                                           | 1                                                                                                                | 1                                                                  | 1                                                               | 1                                                                                  | 1                                                                         | 1                                                                    | 1                                                                                       | 1                                         |
| Yoshikawa 2021  | 1                                                              | n.a.                                                                                                        | 1                                                                                                                | n.a.                                                               | 0                                                               | 1                                                                                  | 0                                                                         | 1                                                                    | 1                                                                                       | n.a.                                      |
| Rübsam 2022     | 1                                                              | 1                                                                                                           | 1                                                                                                                | 1                                                                  | n.k.                                                            | 1                                                                                  | 0                                                                         | 1                                                                    | 0                                                                                       | 1                                         |
| Fukuda 2021     | 1                                                              | 1                                                                                                           | 1                                                                                                                | 1                                                                  | 1                                                               | 1                                                                                  | 0                                                                         | 0                                                                    | 0                                                                                       | 1                                         |
| Montesel 2021   | 1                                                              | 1                                                                                                           | 1                                                                                                                | 1                                                                  | 1                                                               | 1                                                                                  | 0                                                                         | 1                                                                    | 1                                                                                       | 1                                         |
| Narayanan 2021  | 1                                                              | n.a.                                                                                                        | 1                                                                                                                | n.a.                                                               | 0                                                               | 1                                                                                  | 0                                                                         | 0                                                                    | 1                                                                                       | n.a.                                      |
| Hänsli 2021     | 1                                                              | 1                                                                                                           | 1                                                                                                                | 1                                                                  | 1                                                               | 1                                                                                  | 1                                                                         | 1                                                                    | 0                                                                                       | 1                                         |
| Bilgic 2021     | 1                                                              | 1                                                                                                           | 1                                                                                                                | 1                                                                  | 1                                                               | 1                                                                                  | 0                                                                         | 1                                                                    | 1                                                                                       | 1                                         |
| Shigemoto 2021  | 1                                                              | n.a.                                                                                                        | 1                                                                                                                | n.a.                                                               | 0                                                               | 1                                                                                  | 0                                                                         | 1                                                                    | 1                                                                                       | n.a.                                      |
| Giunta 2022     | 1                                                              | 1                                                                                                           | 1                                                                                                                | 1                                                                  | 1                                                               | 1                                                                                  | 1                                                                         | 1                                                                    | 1                                                                                       | 1                                         |
| Kessler 2022    | 1                                                              | n.a.                                                                                                        | 1                                                                                                                | n.a.                                                               | 0                                                               | 1                                                                                  | 0                                                                         | 1                                                                    | 0                                                                                       | n.a.                                      |
| Leclaire 2022   | 1                                                              | n.a.                                                                                                        | 1                                                                                                                | n.a.                                                               | 0                                                               | 1                                                                                  | 0                                                                         | 1                                                                    | 0                                                                                       | n.a.                                      |
| Barchichat 2022 | 1                                                              | n.a.                                                                                                        | 1                                                                                                                | n.a.                                                               | 0                                                               | 1                                                                                  | 1                                                                         | 1                                                                    | 1                                                                                       | n.a.                                      |
| Lee 2022        | 1                                                              | n.a.                                                                                                        | 1                                                                                                                | n.a.                                                               | 0                                                               | 1                                                                                  | 1                                                                         | 1                                                                    | 1                                                                                       | n.a.                                      |
| Ito 2022        | 1                                                              | 1                                                                                                           | 1                                                                                                                | 1                                                                  | n.k.                                                            | 1                                                                                  | 0                                                                         | 1                                                                    | 1                                                                                       | n.a.                                      |
| Ilesato 2022    | 1                                                              | n.a.                                                                                                        | 1                                                                                                                | n.a.                                                               | 0                                                               | 1                                                                                  | 0                                                                         | 1                                                                    | 0                                                                                       | n.a.                                      |
| Hikichi 2021    | 1                                                              | 1                                                                                                           | 1                                                                                                                | n.k.                                                               | 0                                                               | 1                                                                                  | 1                                                                         | 1                                                                    | 1                                                                                       | n.a.                                      |
| Nguyen 2022     | 1                                                              | 1                                                                                                           | n.k.                                                                                                             | n.k.                                                               | 0                                                               | 1                                                                                  | 0                                                                         | 0                                                                    | 1                                                                                       | n.a.                                      |
| Witkin 2020     | 1                                                              | 1                                                                                                           | 1                                                                                                                | n.k.                                                               | n.k.                                                            | 1                                                                                  | 1                                                                         | 1                                                                    | 1                                                                                       | n.a.                                      |
| Kataoka 2021    | 1                                                              | 1                                                                                                           | 1                                                                                                                | n.k.                                                               | 0                                                               | 1                                                                                  | 1                                                                         | 1                                                                    | 1                                                                                       | n.a.                                      |
| Kondapalli 2020 | 1                                                              | n.a.                                                                                                        | 1                                                                                                                | n.a.                                                               | 0                                                               | 1                                                                                  | 0                                                                         | 0                                                                    | 0                                                                                       | n.a.                                      |
| Riedel 2021     | 1                                                              | n.a.                                                                                                        | 1                                                                                                                | n.a.                                                               | 0                                                               | 1                                                                                  | 0                                                                         | 0                                                                    | 0                                                                                       | n.a.                                      |
| Kaupke 2021     | 1                                                              | n.a.                                                                                                        | 1                                                                                                                | n.a.                                                               | 0                                                               | 1                                                                                  | 1                                                                         | 1                                                                    | 0                                                                                       | n.a.                                      |

|                  |   |      |   |      |      |   |   |   |   |      |
|------------------|---|------|---|------|------|---|---|---|---|------|
| Angerer 2020     | 1 | n.a. | 1 | n.a. | 0    | 1 | 0 | 0 | 0 | n.a. |
| Kessler 2022 (2) | 1 | n.a. | 1 | n.a. | 0    | 1 | 1 | 1 | 0 | n.a. |
| Baumal 2020      | 1 | 1    | 1 | 1    | n.k. | 1 | 1 | 1 | 1 | 1    |

Note: 1 = yes; 0 = no; n.a. = not applicable; n.k. = not known.

**Supplemental Table S2.** Clinical presentation of intraocular inflammation in response to intravitreal Brolucizumab injection.

| <b>Clinical finding</b>    | <b>% of reported</b>           |                       | <b>N total<br/>(reported)</b> | <b>% of all eyes<br/>(n=46)*</b> |
|----------------------------|--------------------------------|-----------------------|-------------------------------|----------------------------------|
|                            | <b>n (finding<br/>present)</b> | <b>eyes<br/>(n/N)</b> |                               |                                  |
| anterior uveitis           | 31                             | 88.6                  | 35                            | 67.4                             |
| vitreal infiltration       | 36                             | 92.3                  | 39                            | 78.3                             |
| retinal vascular occlusion | 29                             | 85.3                  | 34                            | 63.0                             |
| retinal vasculitis         | 33                             | 84.6                  | 39                            | 71.7                             |
| retinal hemorrhages        | 13                             | 81.3                  | 16                            | 28.3                             |
| macular involvement        | 7                              | 58.3                  | 12                            | 15.2                             |

\* The portion of the total number of eyes is provided based on the assumption that findings not reported at diagnosis were not present at baseline

**Supplemental Table S3.** Treatment initiation in response to intraocular inflammation

|                             | % of reported  |               |                       |                          |
|-----------------------------|----------------|---------------|-----------------------|--------------------------|
|                             | n<br>(present) | eyes<br>(n/N) | N total<br>(reported) | % of all eyes<br>(n=46)* |
| Corticosteroids:            |                |               |                       |                          |
| - topical                   | 32             | 94.1          | 34                    | 69.6                     |
| - intraocular               | 5              | 62.5          | 8                     | 10.9                     |
| - peroral                   | 19             | 63.3          | 30                    | 41.3                     |
| - intravenous $\pm$ peroral | 10             | 76.9          | 13                    | 21.7                     |
| Systemic antibiotics        | 2              | 40            | 5                     | 4.3                      |
| Hemodilutive agents         | 1              | 16.7          | 5                     | 2.2                      |
| Vitrectomy                  | 4              | 40            | 9                     | 8.7                      |

\* The portion of the total population is provided based on the assumption that treatments not reported at diagnosis were not given.
